# Supplementary material for: A novel method for the synthesis of core–shell nanoparticles for functional applications based on long-term confinement in a radio frequency plasma
Source: Royal Society of Chemistry journal article supplement (doi:10.1039/d2na00806h), 2023-01-01
Supplement: d2na00806h1.pdf [file d2na00806h1.pdf]

## Supplementary Information

### A novel method for the synthesis of core-shell nanoparticles for functional applications based on the long-term confinement in a radio frequency plasma

Oguz Han Asnaz,<sup>1,\*</sup> Jonas Drewes,<sup>2,\*</sup> Marie Elis,<sup>3</sup> Thomas Strunskus,<sup>2,4</sup> Franko Greiner,<sup>1,4</sup> Oleksandr Polonskyi,<sup>2,#</sup> Franz Faupel,<sup>2,4</sup> Lorenz Kienle,<sup>3,4</sup> Alexander Vahl,<sup>2,4,a</sup> and Jan Benedikt<sup>1,4,b</sup>

<sup>a</sup> E-mail: alva@tf.uni-kiel.de

<sup>b</sup> E-mail: benedikt@physik.uni-kiel.de

\* These authors contributed equally to this work

# currently at: Dept. of Chemical Engineering, Engineering II, University of California - Santa Barbara, Santa Barbara, CA 93106, United States

<sup>1</sup> Institute of Experimental and Applied Physics, Kiel University, Leibnizstr. 19, D-24098 Kiel, Germany

<sup>2</sup> Chair for Multicomponent Materials, Institute of Materials Science, Kiel University, Kaiserstr. 2, D-24143 Kiel, Germany

<sup>3</sup> Chair for Synthesis and Real Structure, Institute of Materials Science, Kiel University, Kaiserstr. 2, D-24143 Kiel, Germany

<sup>4</sup> Kiel Nano, Surface and Interface Science KiNSIS, Kiel University, Christian-Albrechts-Platz 4, D-24118 Kiel, Germany

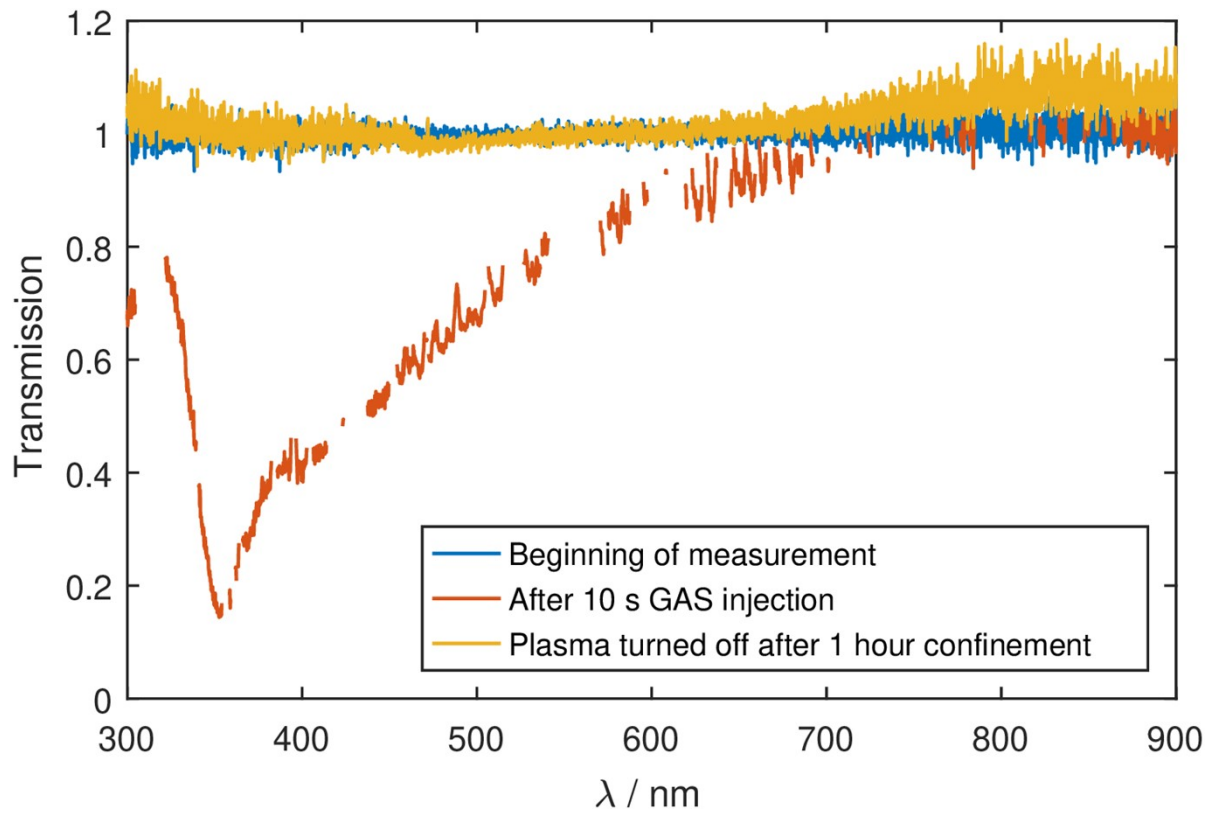

*Fig. 1: UV-Vis spectrum of LSPR comparing signal before, during, and after 1 hour of particle confinement. In the spectrum during particle confinement, plasma emission lines have been filtered out. The difference between the first and last spectrum comes from a slight drift of the used light source over time.*

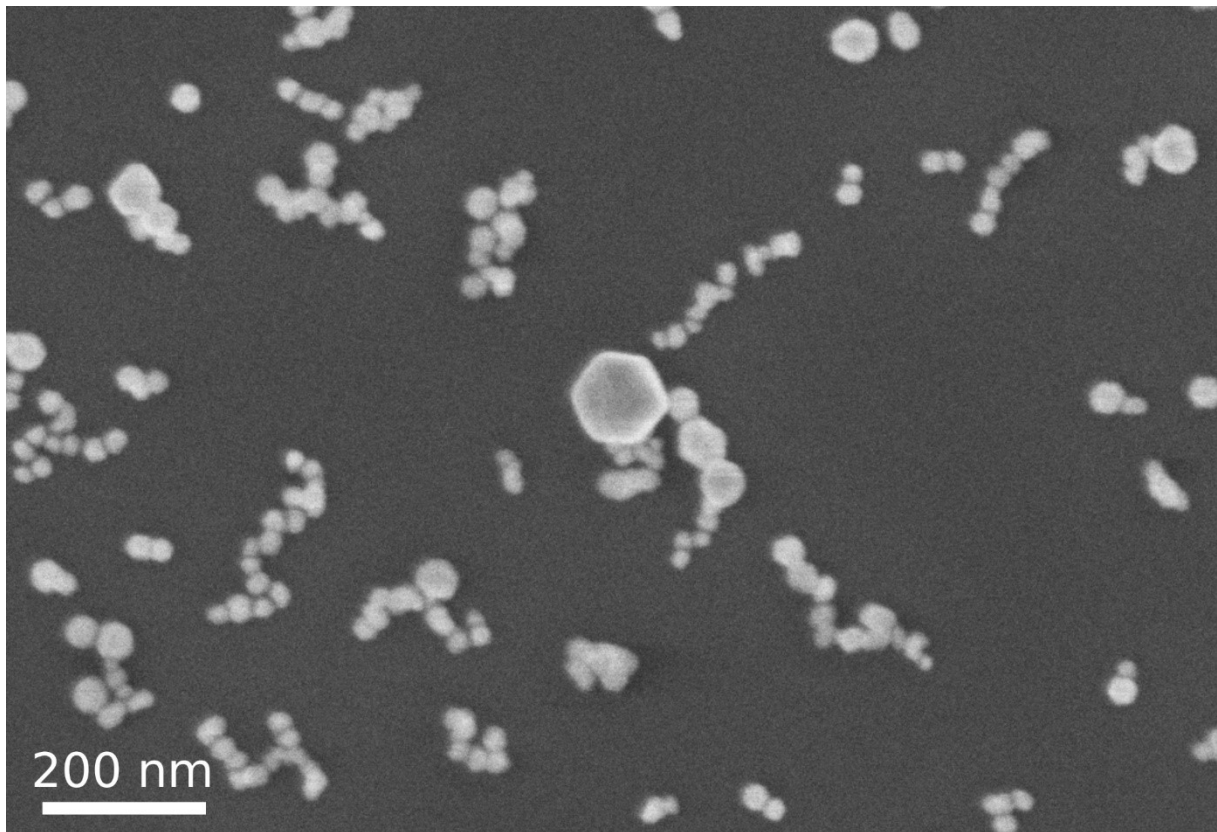

*Fig. 2: SEM image of deposited Ag NPs coated for 3 min with  $\text{SiH}_4$ . Well visible are agglomerates of NPs. It is unclear if the NPs agglomerate during the synthesis or on the substrate during the extraction.*

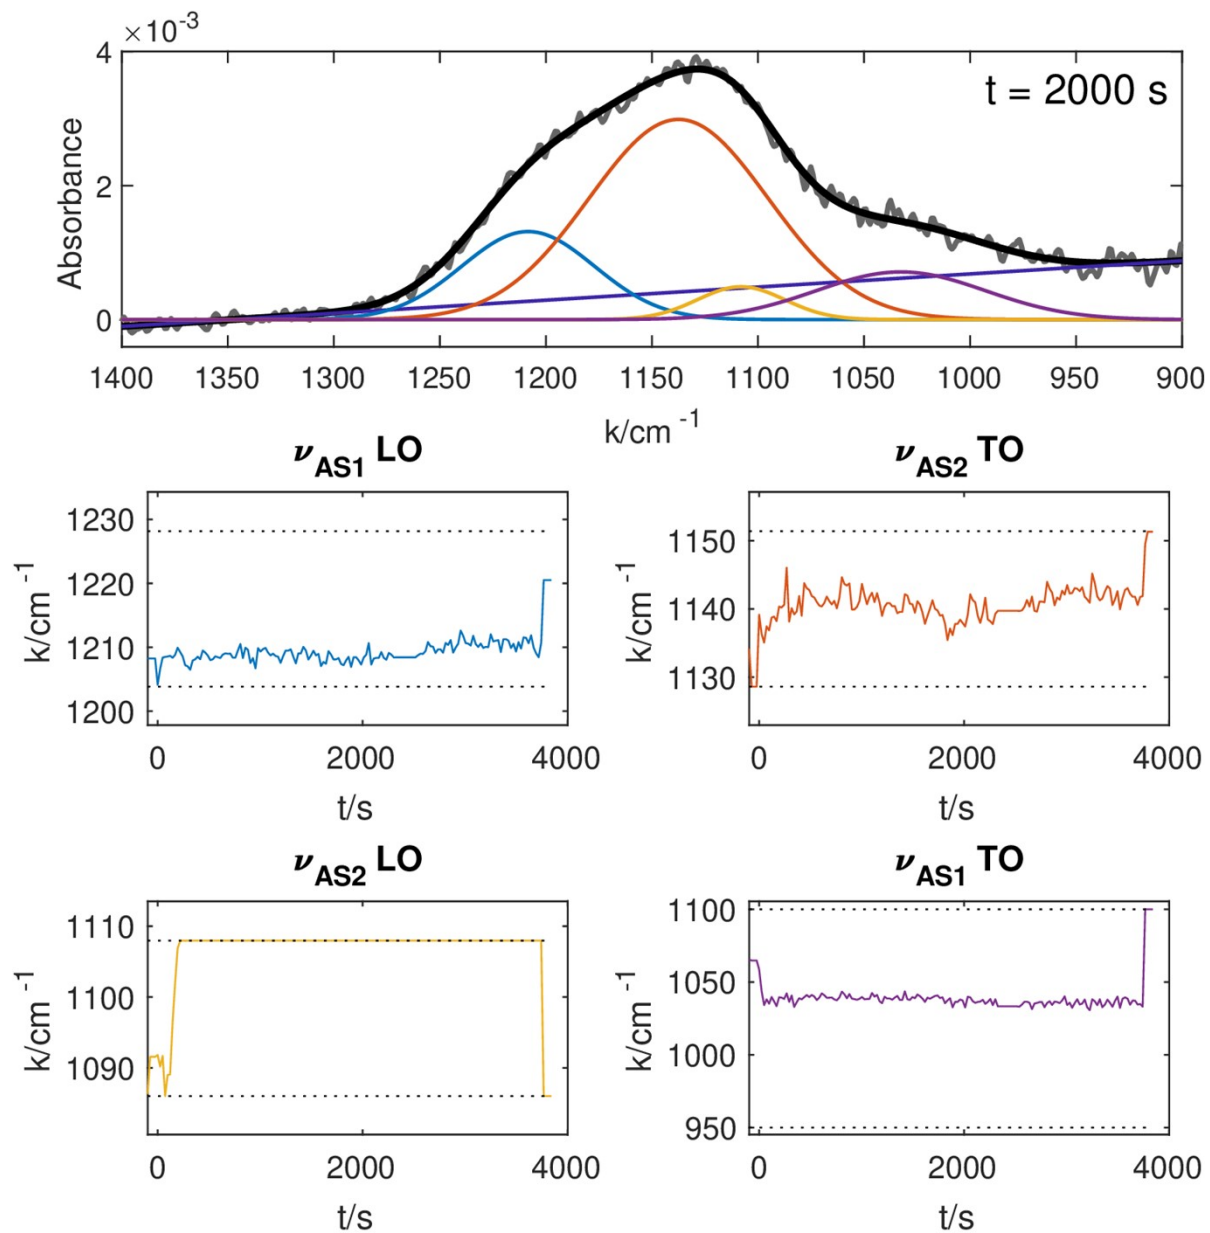

Fig. 3 Top: Decomposition of FTIR spectrum at 2000 s of a long-term confinement measurement into its four constituting vibrational lines. Bottom: Time evolution of fitted peak positions for each line with lower and upper bounds indicated with dotted lines. For  $\nu_{\text{AS2}}$  we were unable to find parameters avoiding reaching the upper bound.

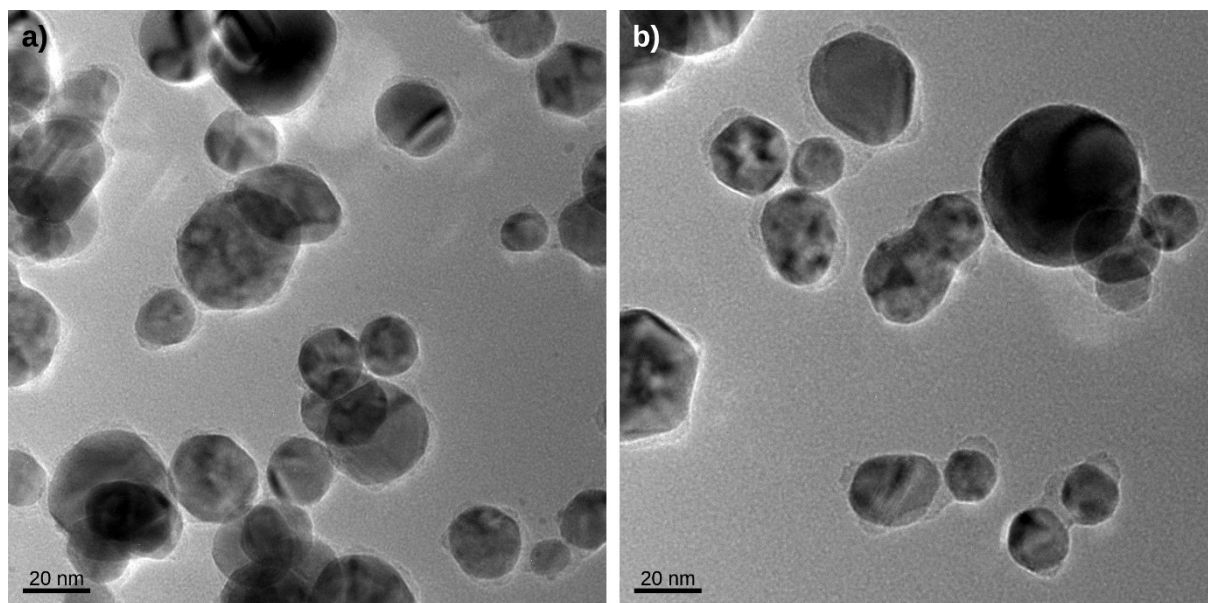

*Fig. 4: TEM images of particles after 90 s of silicon coating using  $\text{SiH}_4$ . a) Extracted immediately after coating. b) Extracted after an hour of Ar plasma treatment after coating. No significant effect of the plasma treatment can be seen.*
